# Supplementary material
Source: Springer Nature journal article supplement (https://www.springermedizin.de/resource/supplementary/12936_2011_1803_MOESM3_ESM.pdf/9541802)
Supplement: MOESM3 [file 9541802]

734 articles from  
electronic database  
search

230 excluded – not malaria (fever, child care etc)  
9 excluded – severe malaria  
394 excluded – not ACT (Pre-ACT; IPTi; ITNs; LLINs etc)  
42 excluded – not Africa

Additional 10 studies  
included from grey  
literature search

69 studies relating to  
ACT

55 excluded – ACT but not observation  
studies of delivery at point where  
treatment was sought (coverage, efficacy)

14 studies on ACT  
delivery

8 excluded – ACT prescribing but not  
in the context of facility ACT stock

6 studies that assessed  
prescribing in the  
context of facility ACT
